# Supplementary material
Source: bioRxiv or medRxiv preprint supplement (https://www.medrxiv.org/highwire/filestream/84573/field_highwire_adjunct_files/1/2020.06.04.20121855-2.pdf)

**Supplementary Figure 1. Flowchart, NutriNet-Santé cohort, March-May 2020**

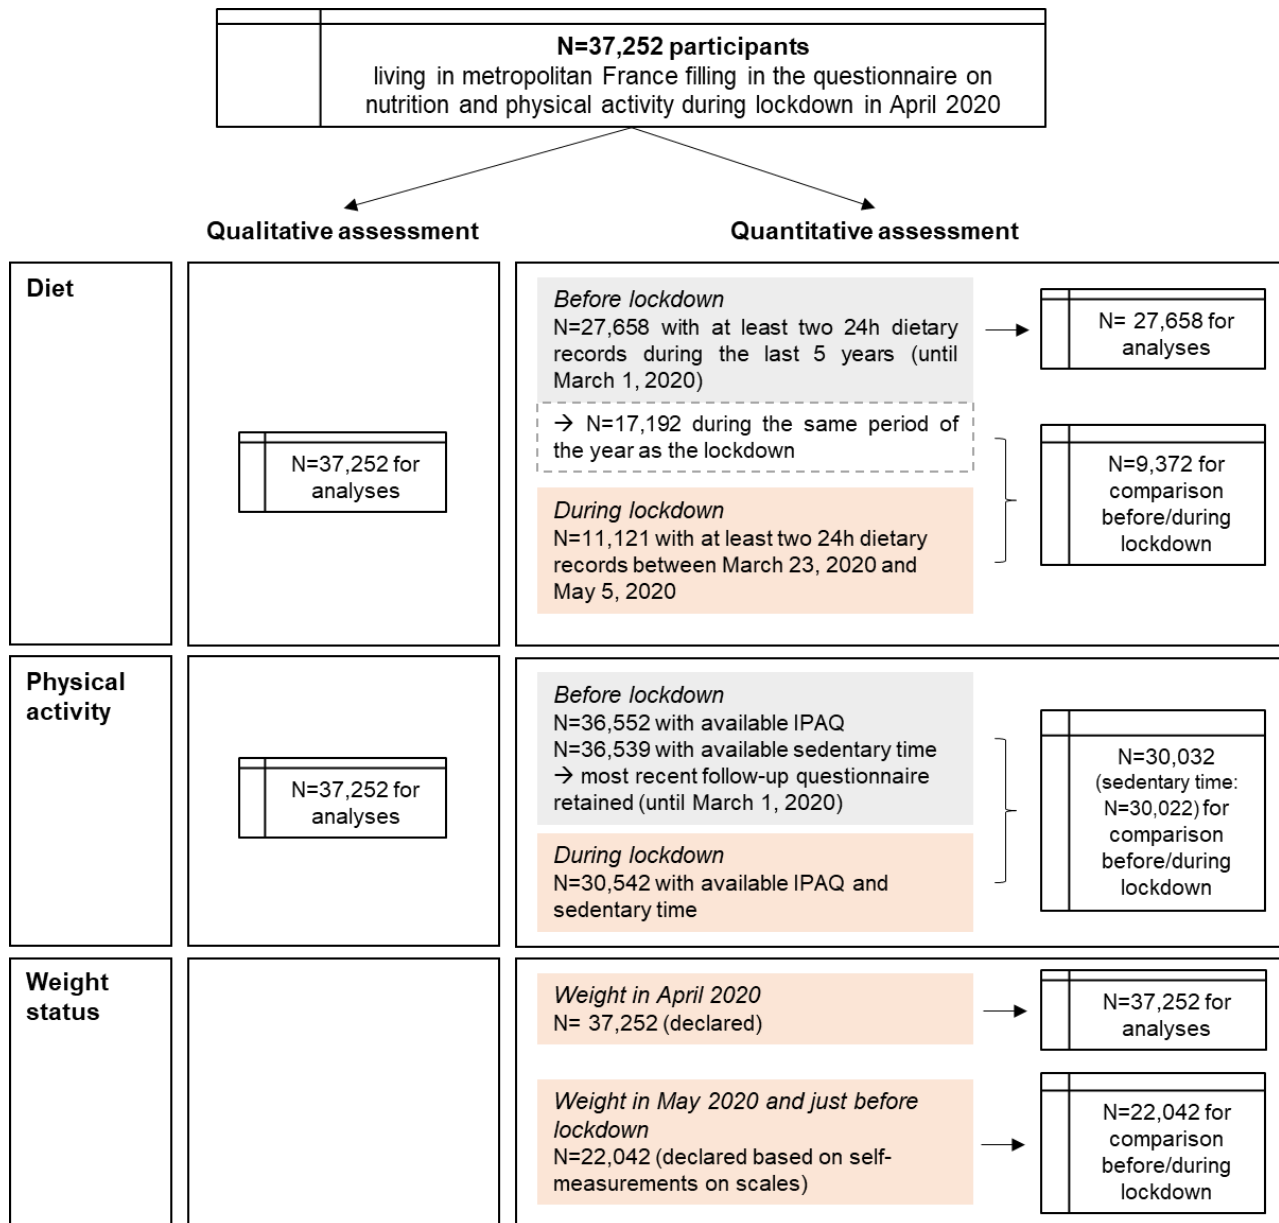

Supplement: Supplementary file [file 2020.06.04.20121855-2.pdf]
